# Supplementary figures and images for: An anomalous anion transfer order in graphene oxide membranes induced by anion–π interactions
Source: Royal Society of Chemistry journal article supplement (doi:10.1039/d3cp00986f), 2023-01-01

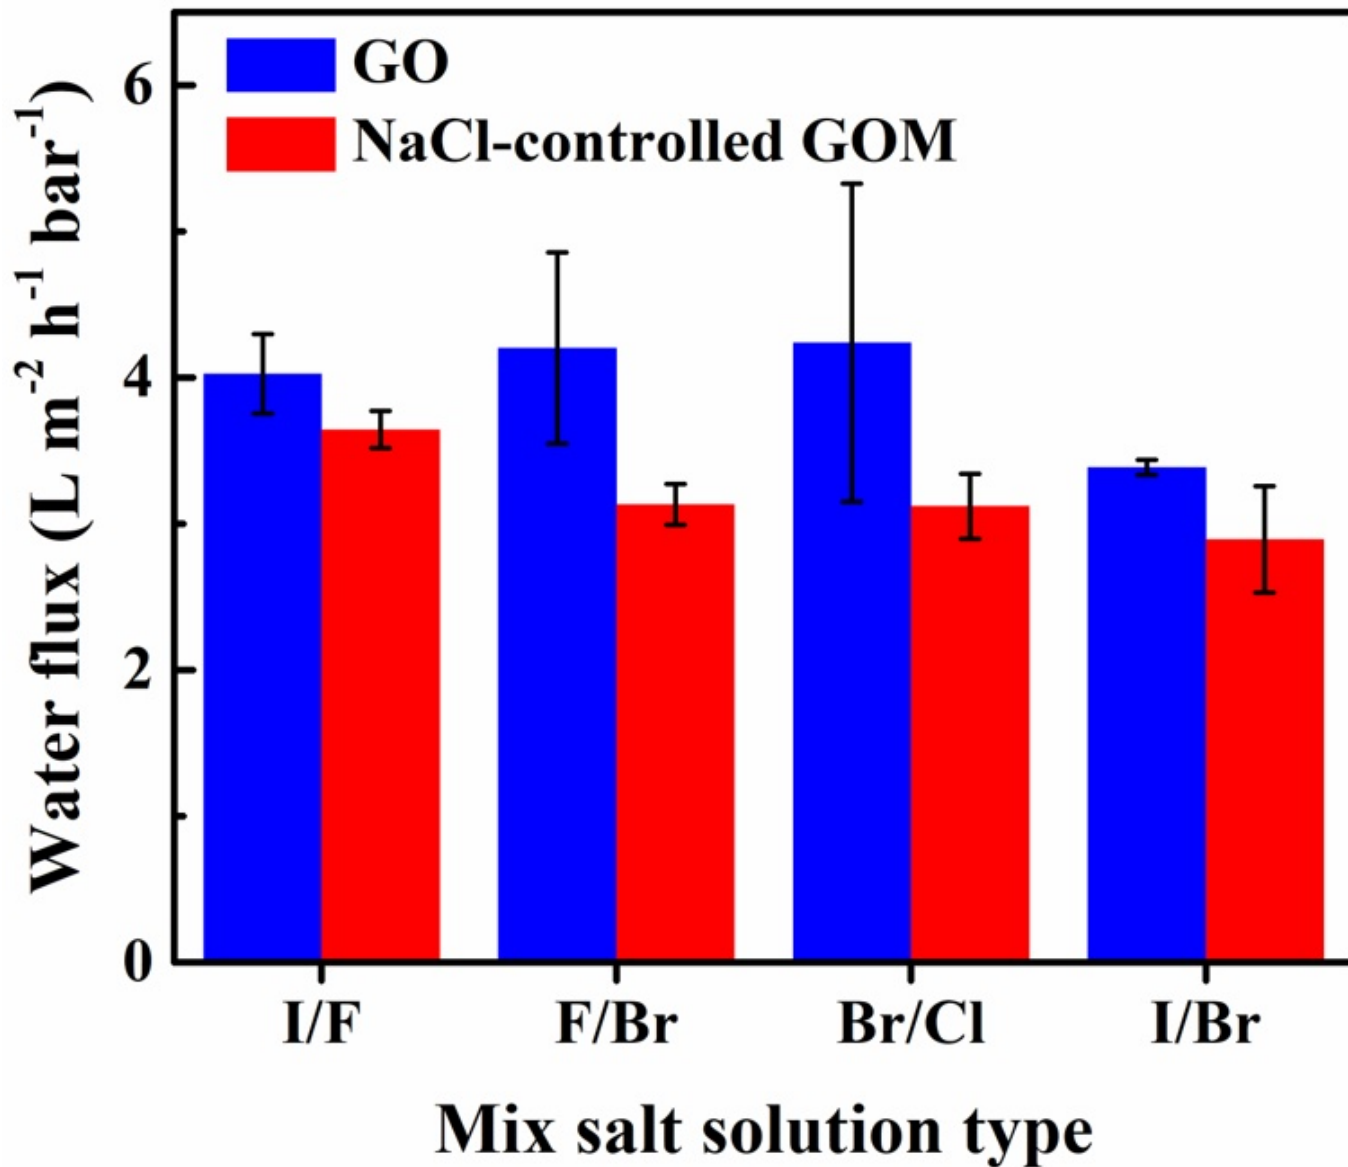

Supplement: d3cp00986f2.pdf [file d3cp00986f2.pdf]

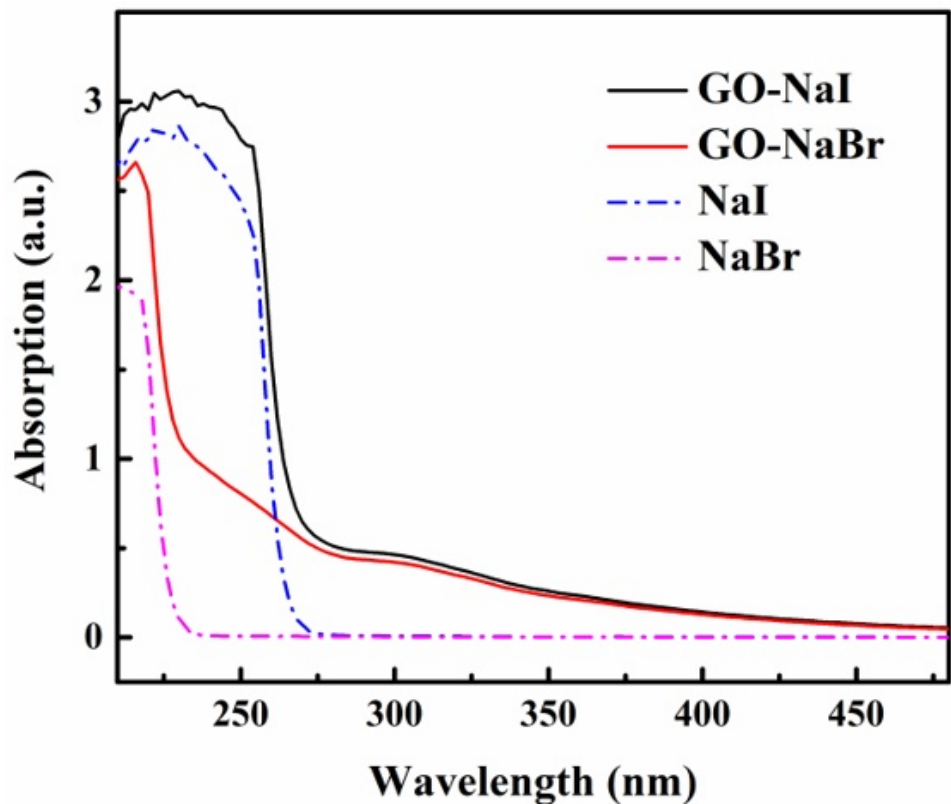

Supplement: d3cp00986f3.pdf [file d3cp00986f3.pdf]

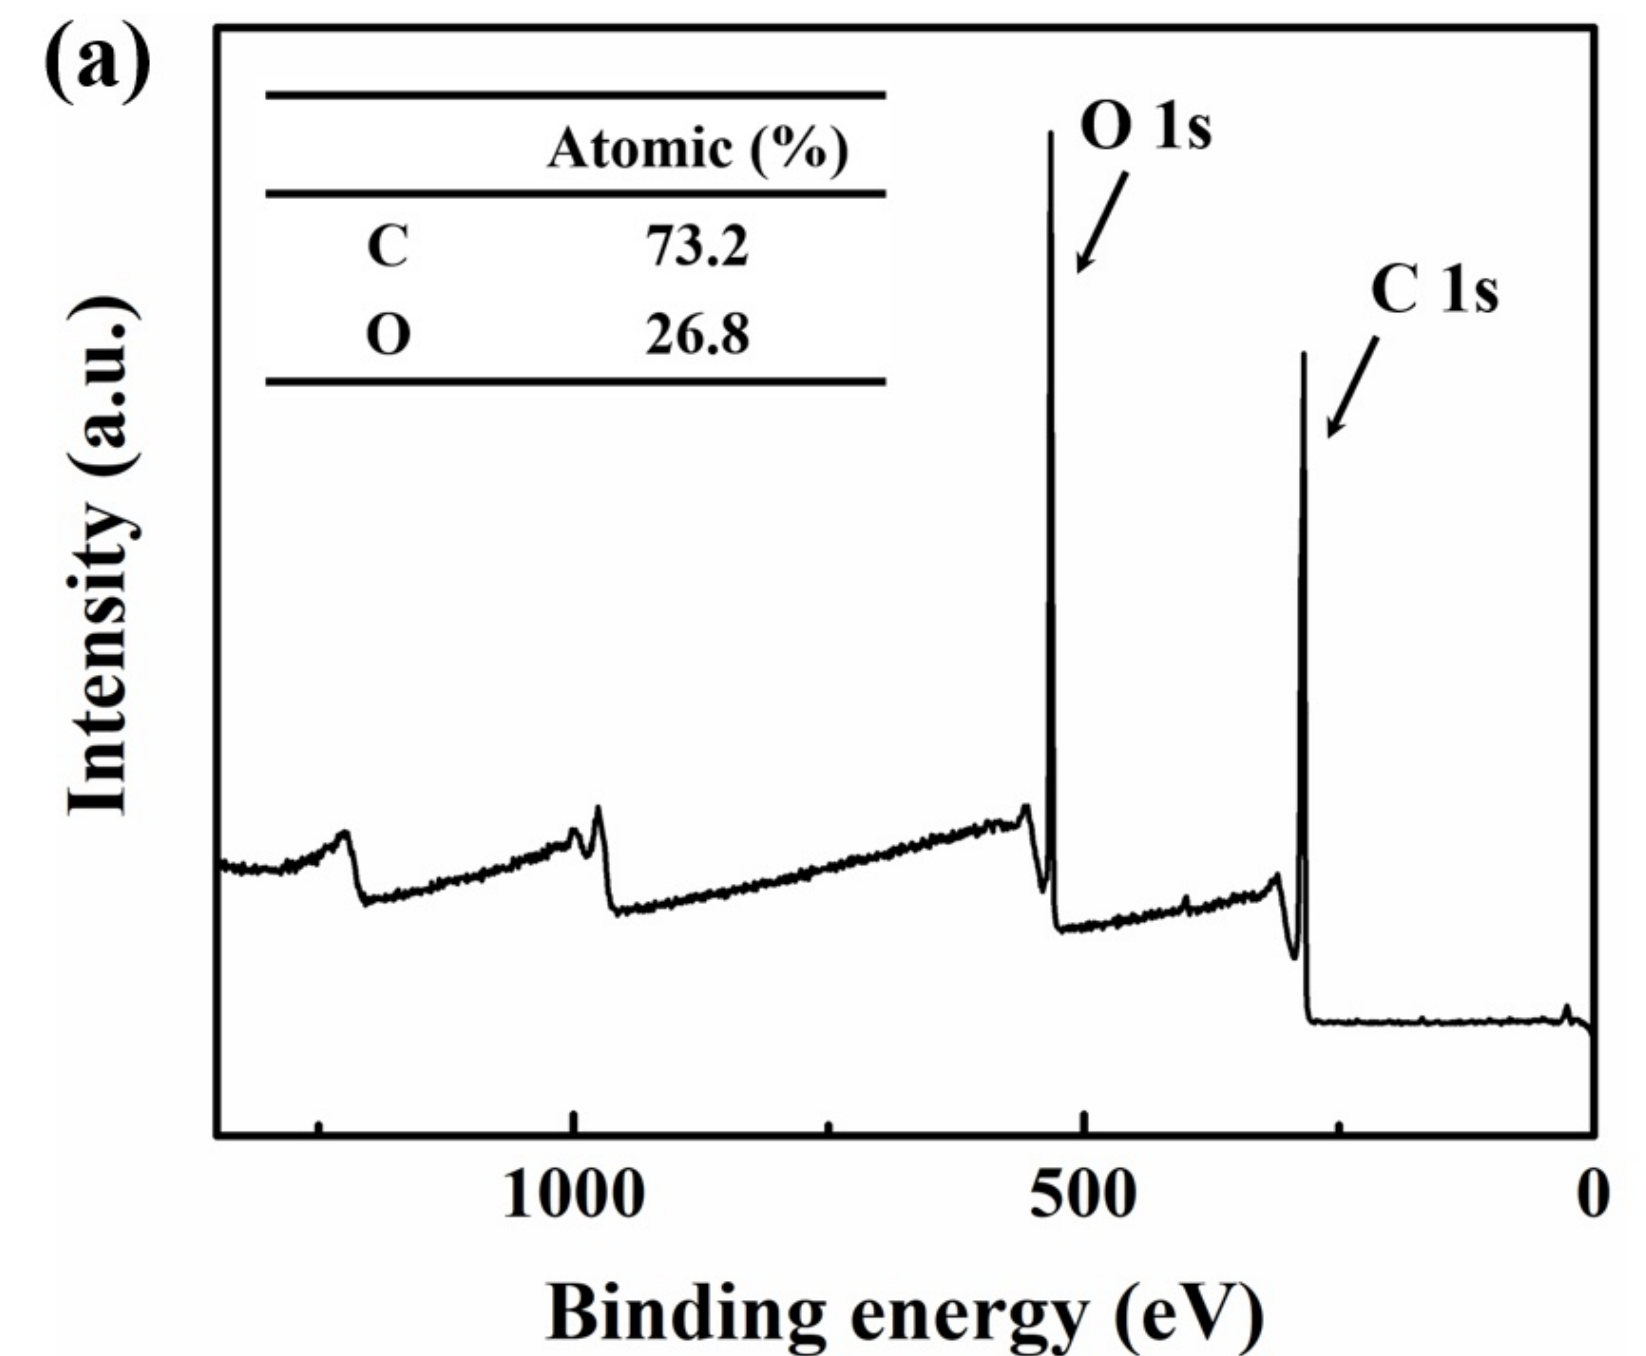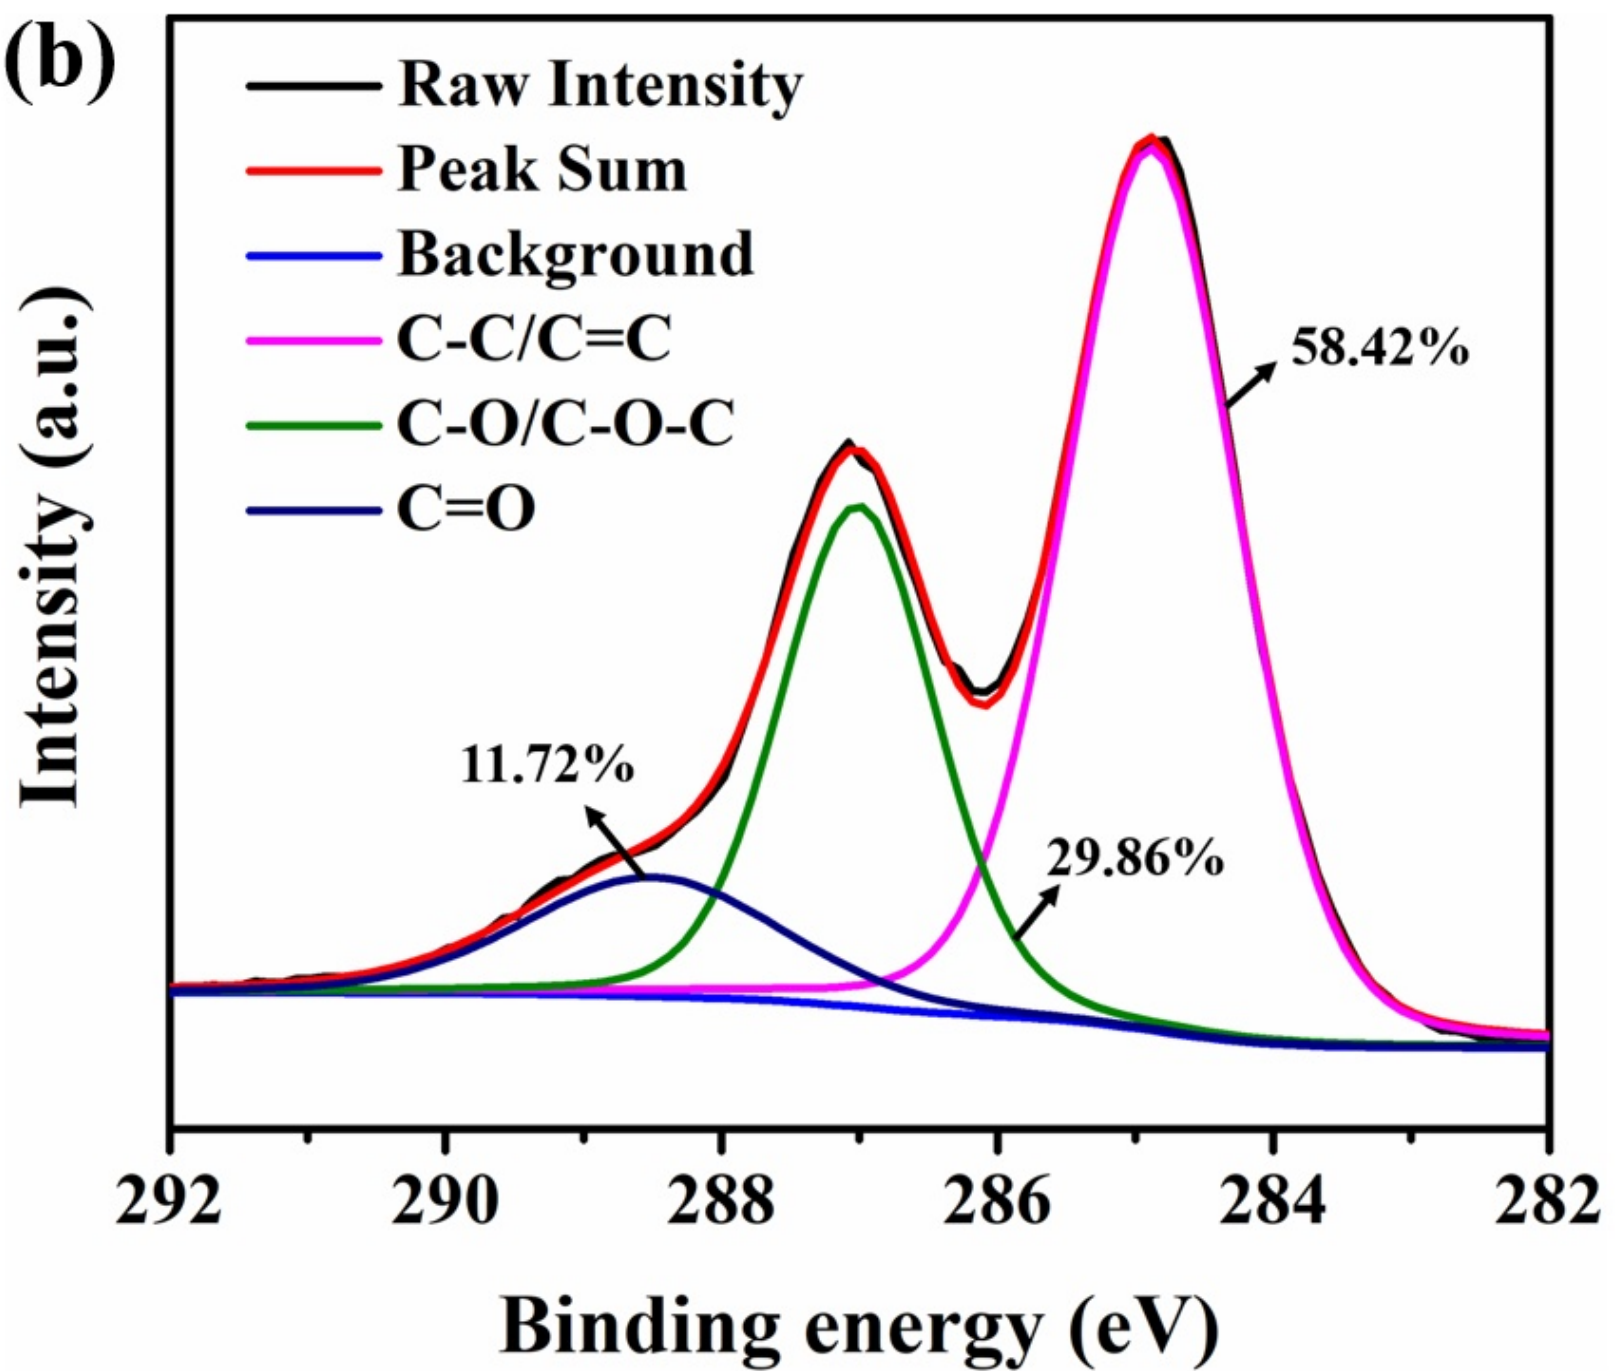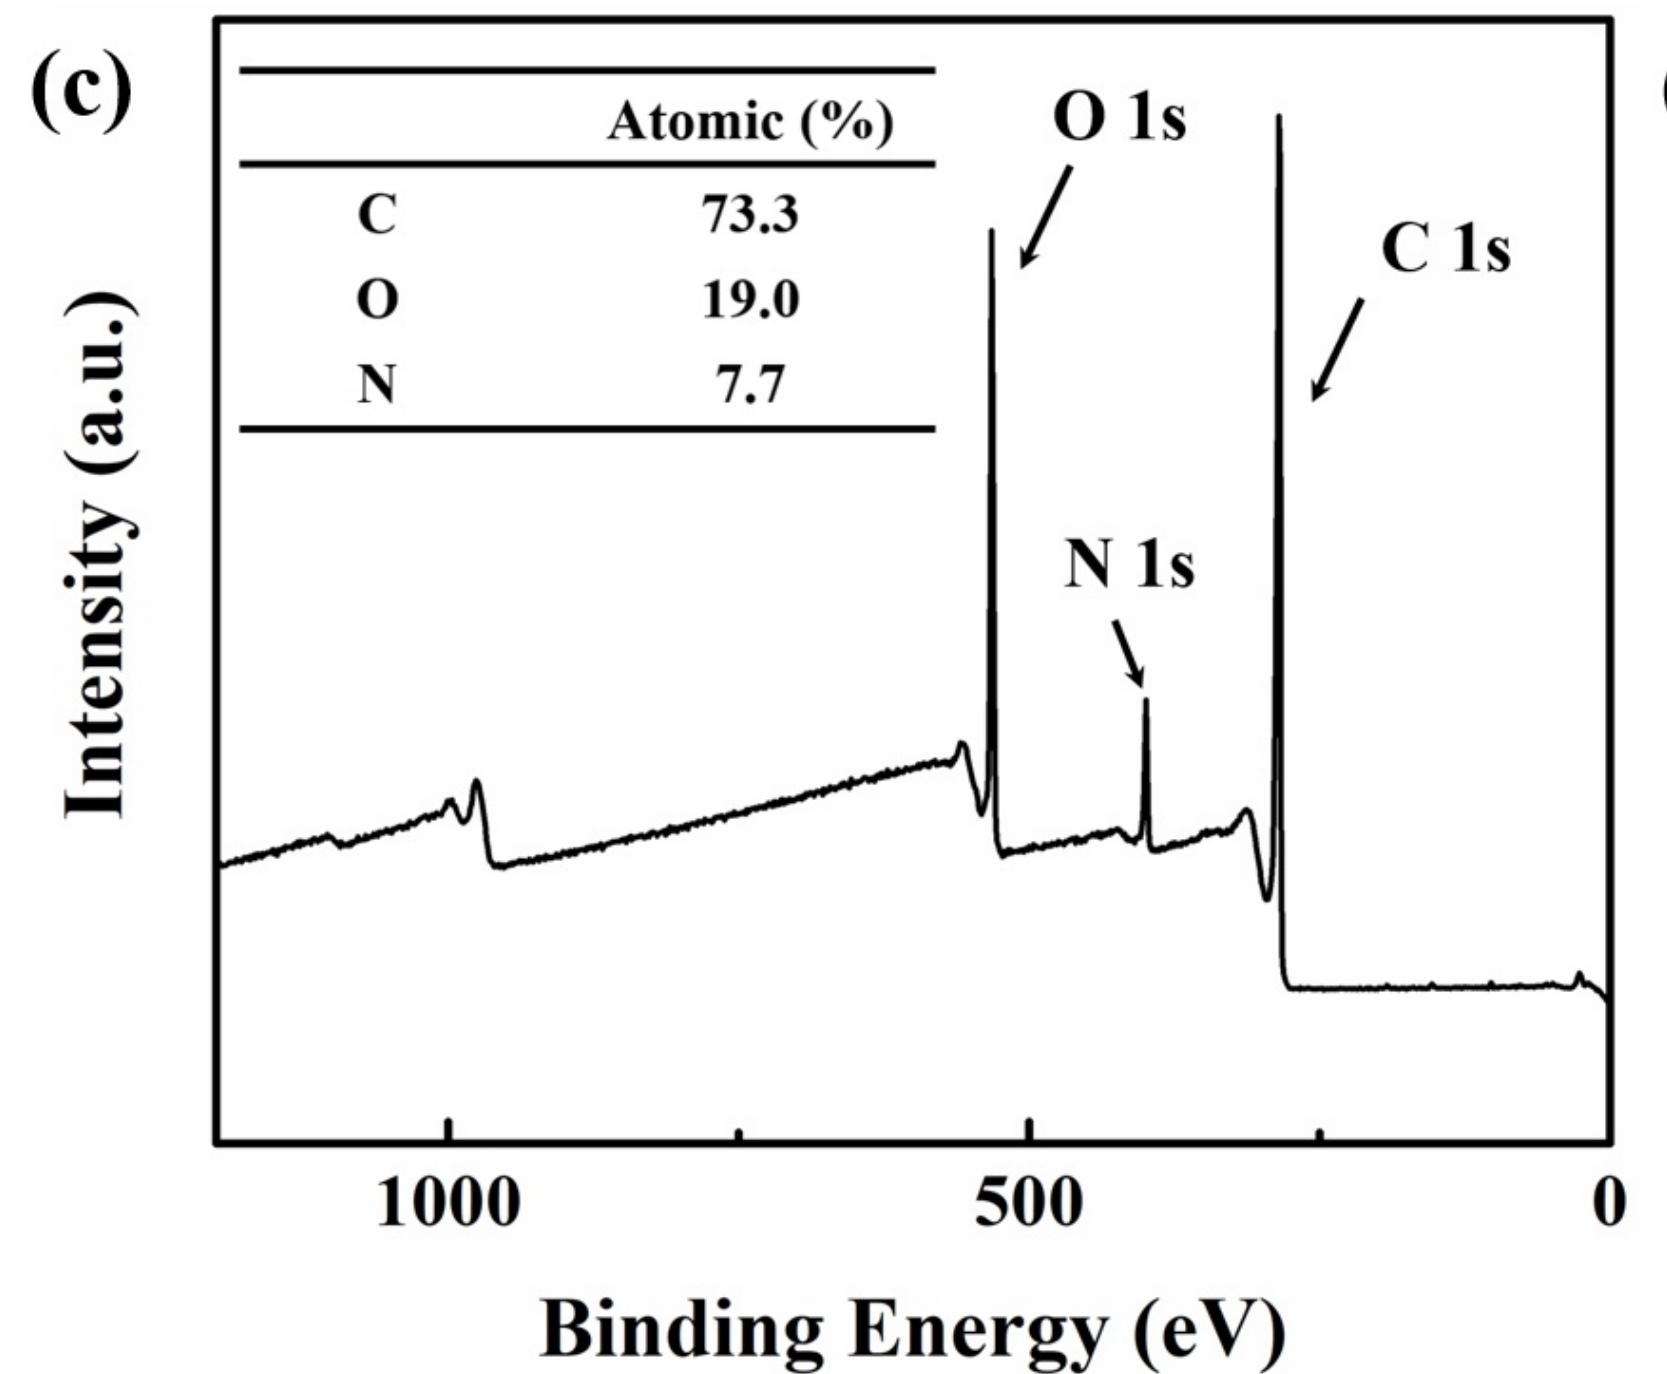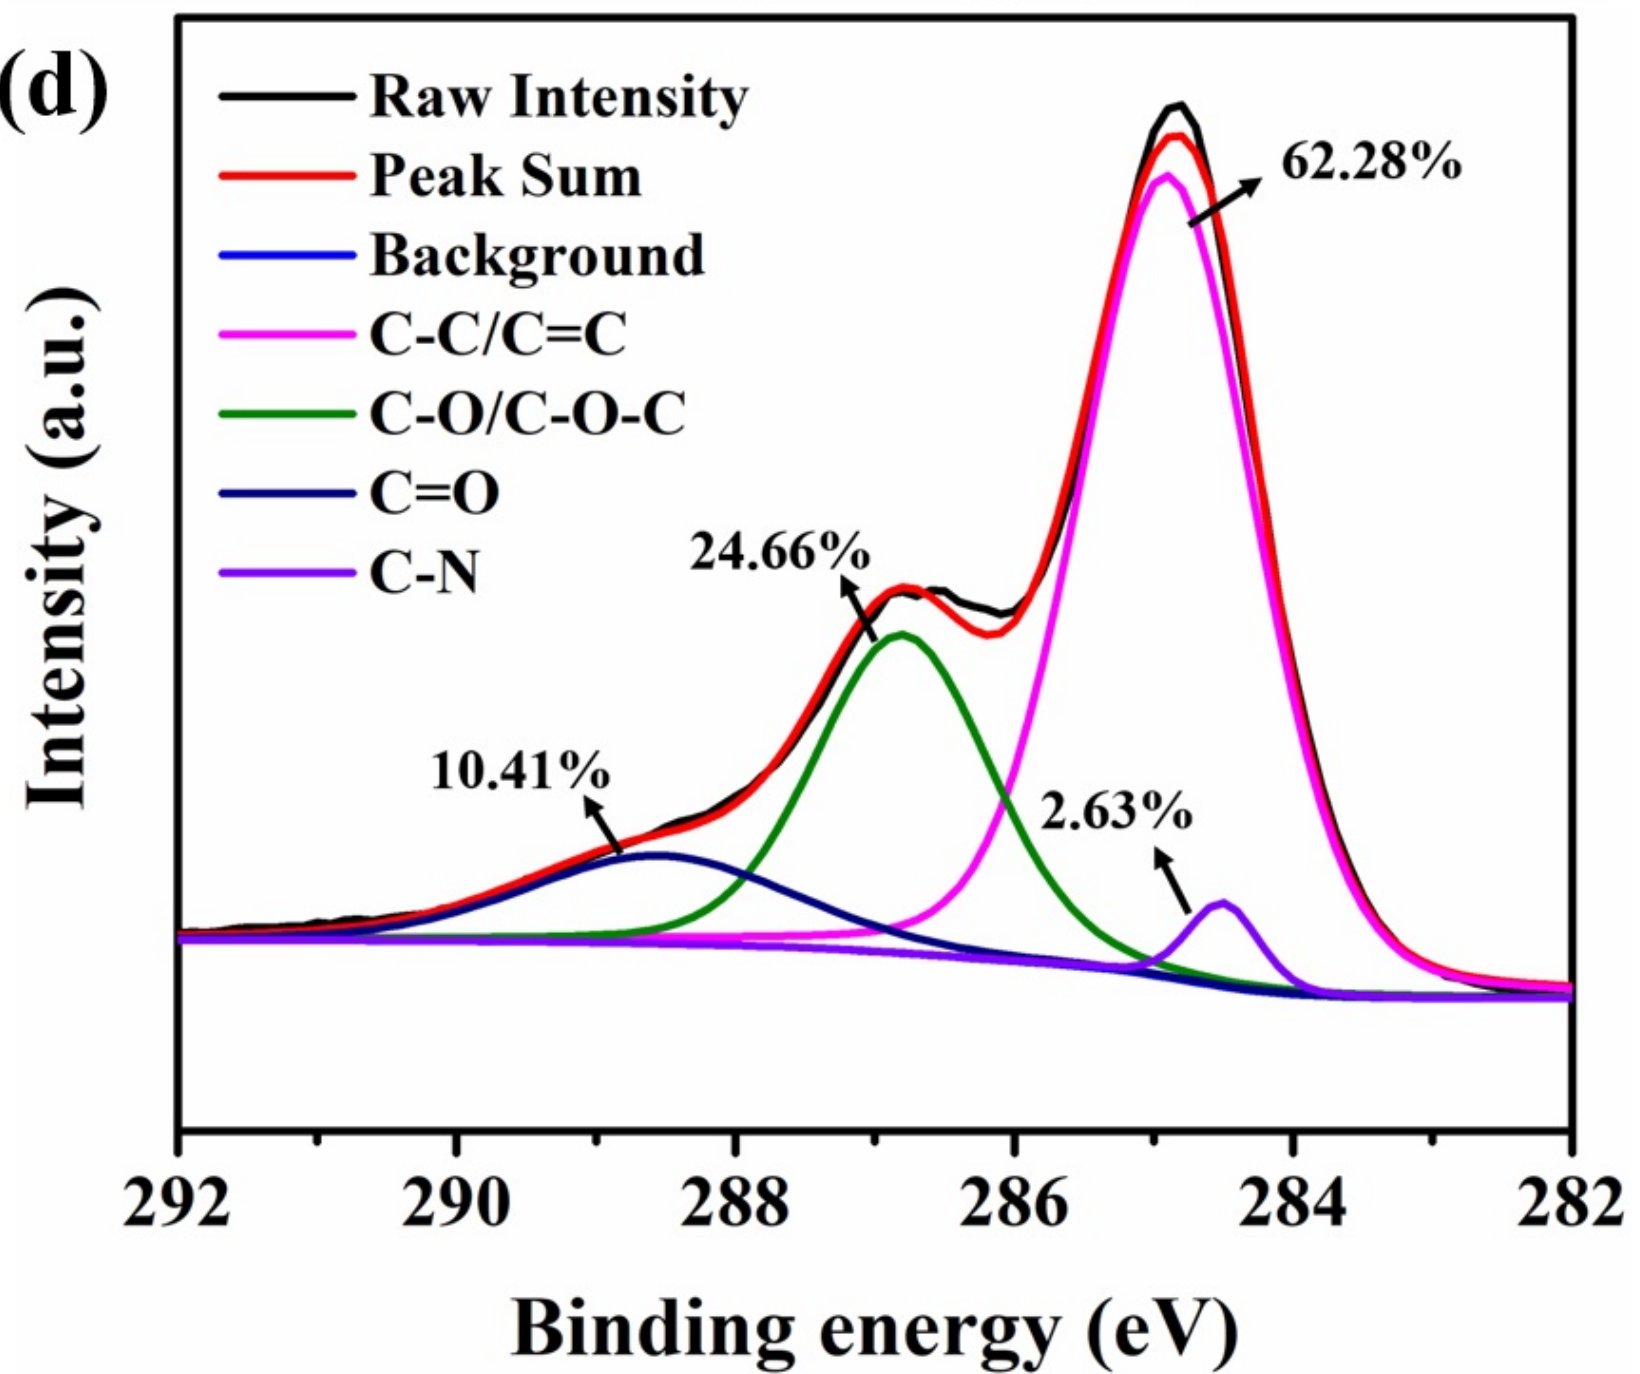

Supplement: d3cp00986f4.pdf [file d3cp00986f4.pdf]

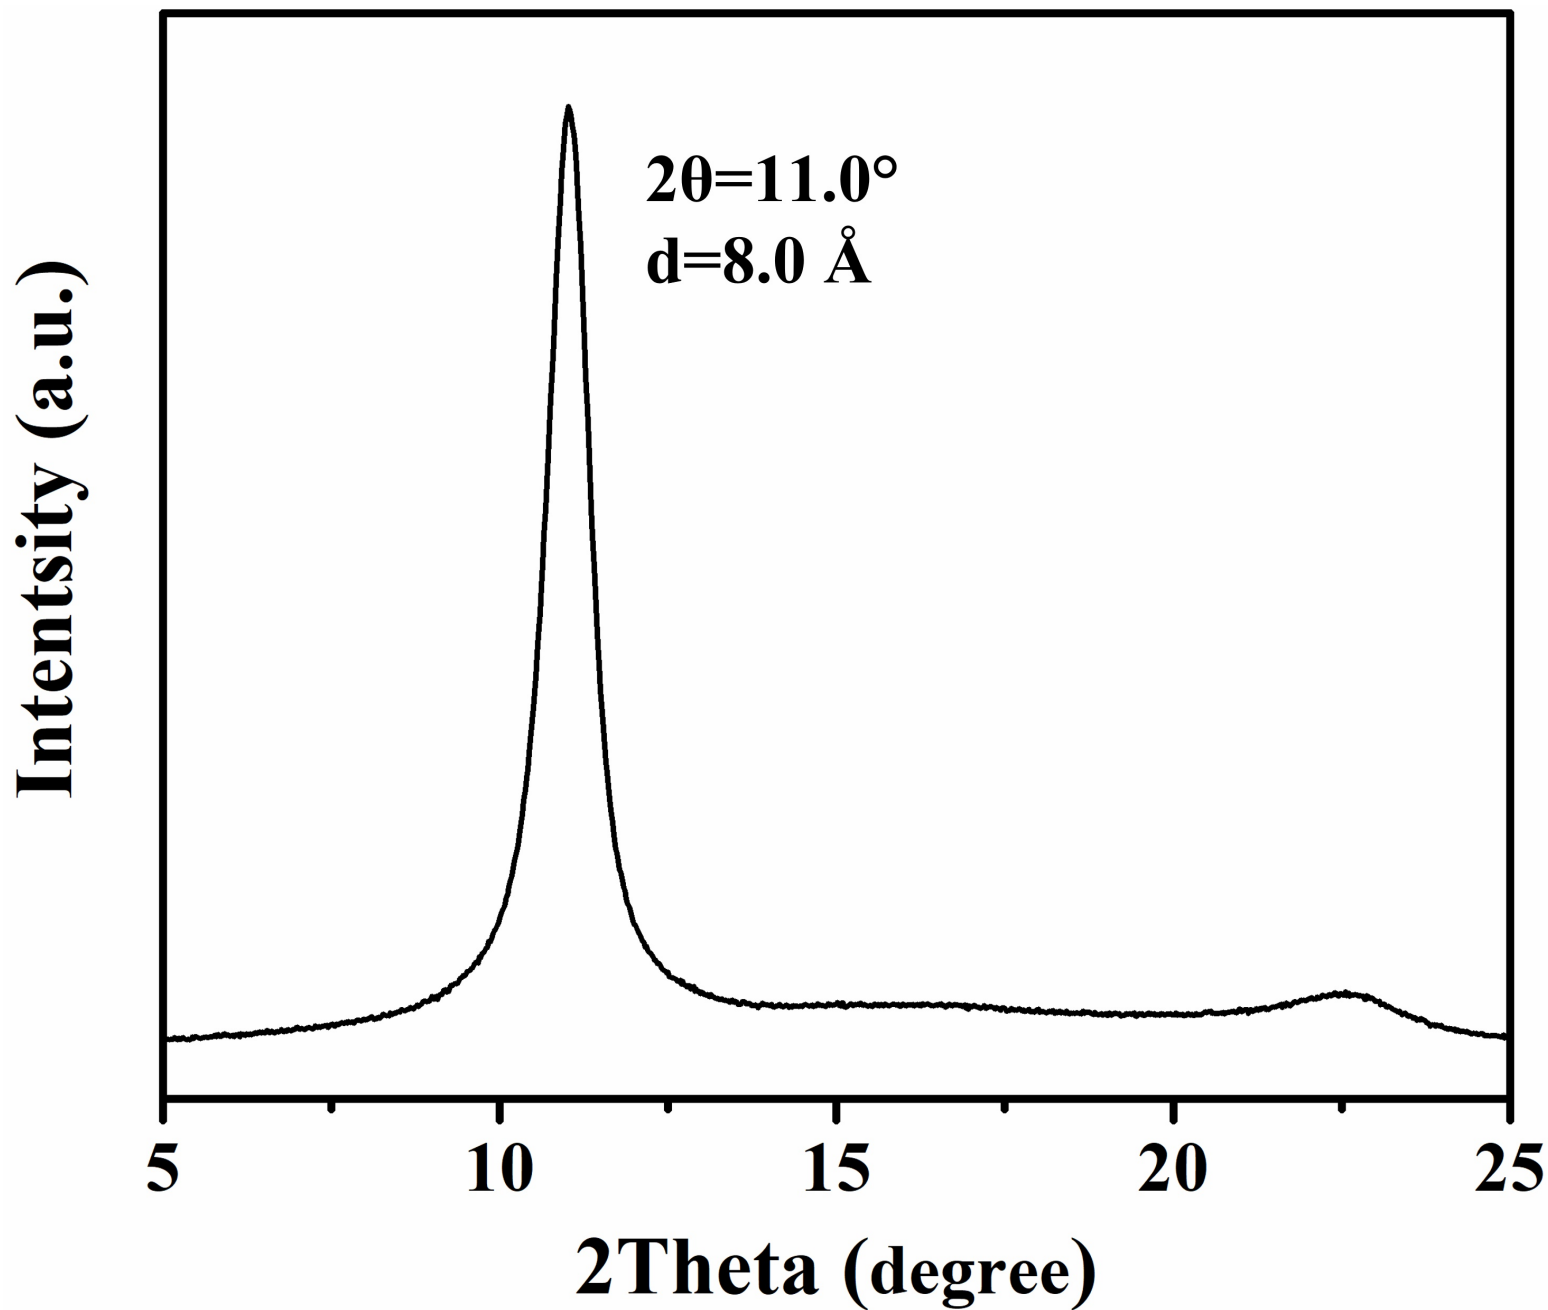

Supplement: d3cp00986f5.pdf [file d3cp00986f5.pdf]
